# Supplementary figures and images for: Clinical Phenotypic Spectrum of 4095 Individuals with Down Syndrome from Text Mining of Electronic Health Records
Source: MDPI journal article supplement (doi:10.3390/genes12081159), 2021-07-28

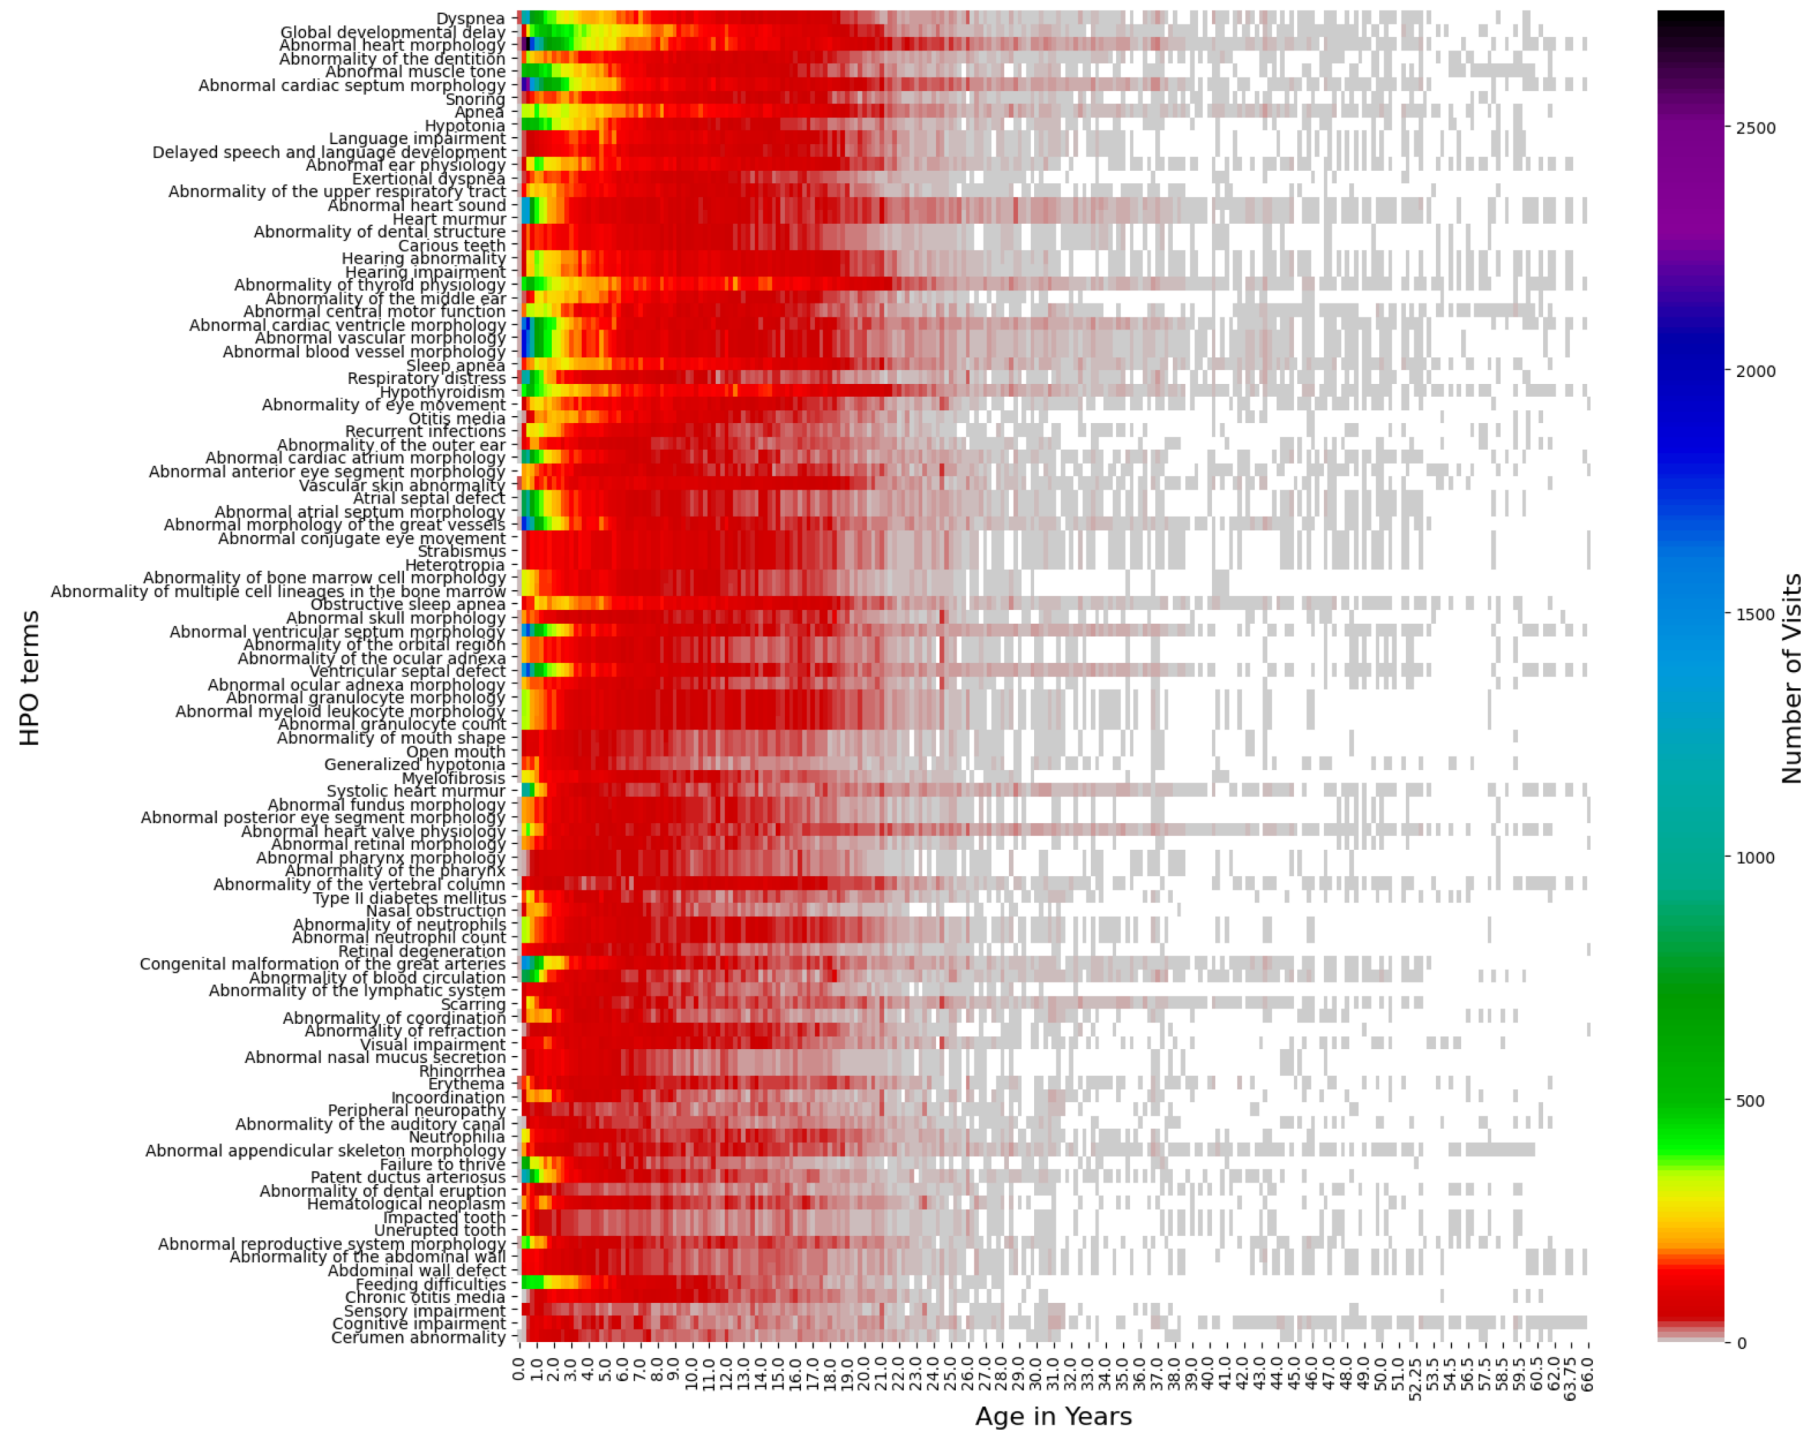

Supplement: s1 [file s1]

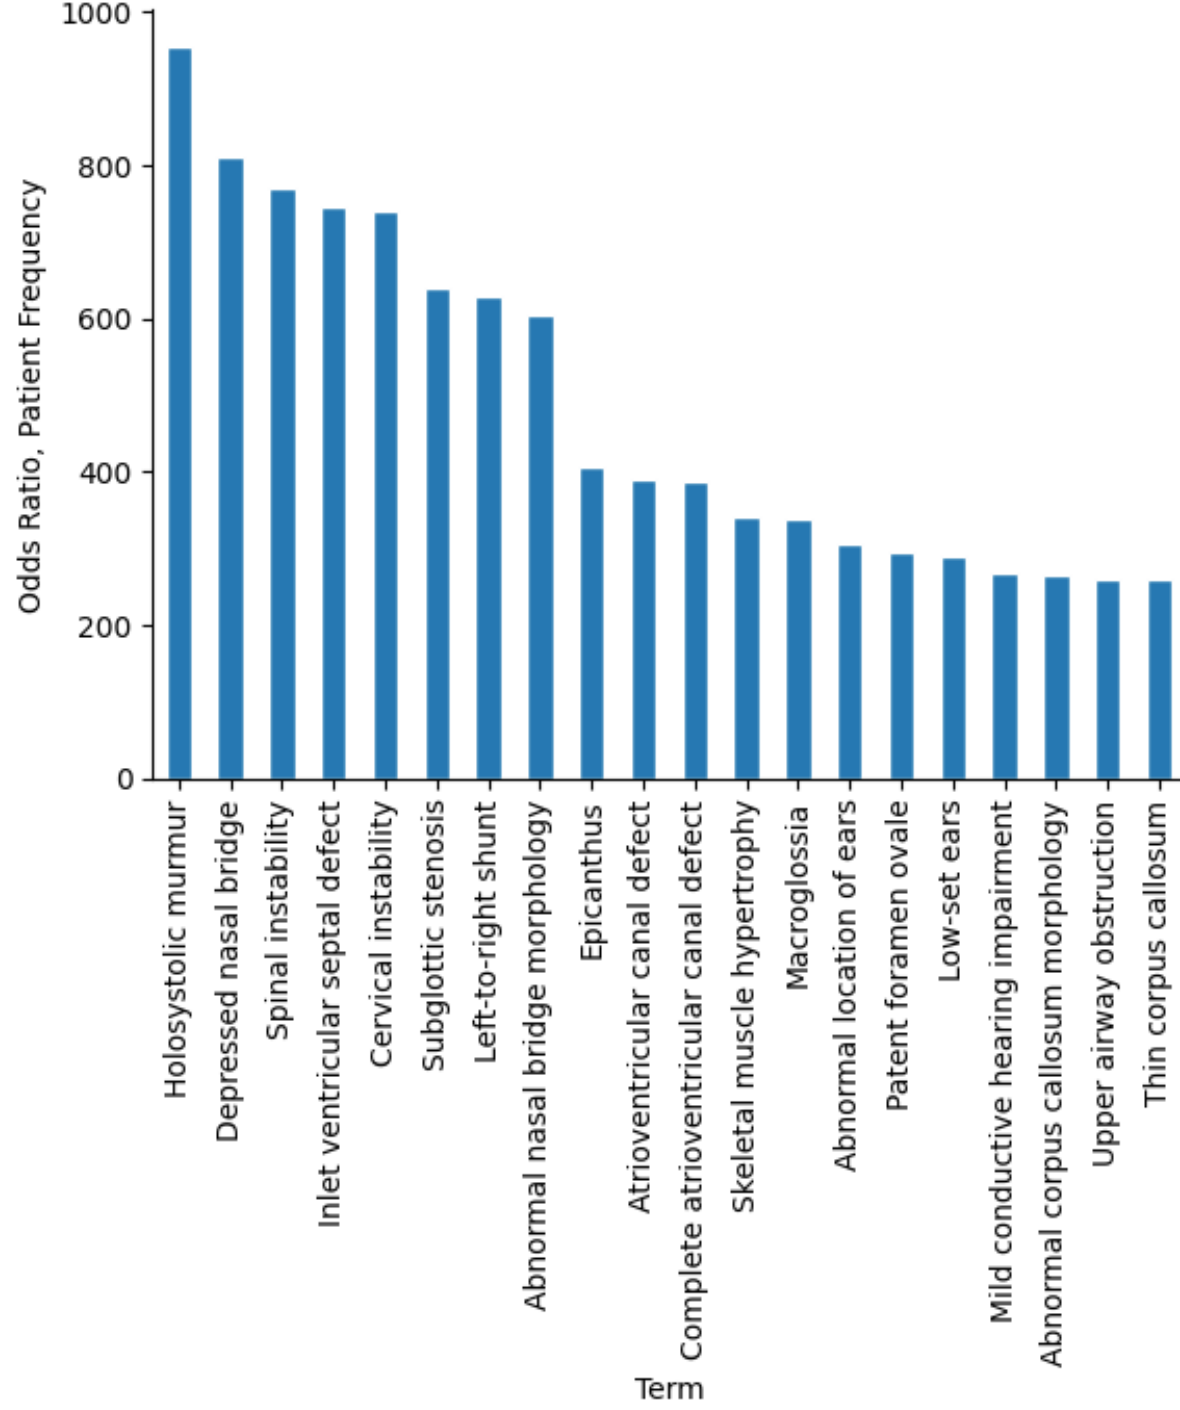

Supplement: s1 [file s1]
